# Supplementary material for: Consistent and chronic cochlear implant use partially reverses cortical effects of single sided deafness in children
Source: PubMed Central journal article supplement (PMC7726152; doi:10.1038/s41598-020-78371-6), 2020-12-09
Supplement: 41598_2020_78371_MOESM1_ESM.pdf [file 41598_2020_78371_MOESM1_ESM.pdf]

1 **Supplementary material**

2

3 **Consistent and chronic cochlear implant use partially reverses cortical effects of single sided**  
4 **deafness in children**

5

6 **Hyo-Jeong Lee<sup>1,2,6</sup>, Daniel Smieja<sup>1,2</sup>, Melissa Jane Polonenko<sup>1,2</sup>, Sharon Lynn Cushing<sup>1,3-5</sup>,**  
7 **Blake Croll Papsin<sup>1,3-5</sup>, Karen Ann Gordon<sup>1-5\*</sup>**

8

9 <sup>1</sup>Archie's Cochlear Implant Laboratory, Hospital for Sick Children, Toronto, Ontario, Canada

10 <sup>2</sup>Department of Communication Disorders, Hospital for Sick Children, Toronto, Ontario, Canada

11 <sup>3</sup>Institute of Medical Science, University of Toronto, Toronto, Ontario, Canada

12 <sup>4</sup>Department of Otolaryngology-Head and Neck Surgery, Hospital for Sick Children, Toronto,  
13 Ontario, Canada

14 <sup>5</sup>Department of Otolaryngology-Head and Neck Surgery, University of Toronto, Toronto, Ontario,  
15 Canada

16 <sup>6</sup>Department of Otorhinolaryngology-Head and Neck Surgery, Hallym University College of  
17 Medicine, Chuncheon, Republic of Korea

18

19 **Running head:** Plasticity with cochlear implant use in children deaf in one ear

20 Dipole moment significantly changes from initial to chronic CI use (period:  $F(1,197.39) = 4.77$ ,  $p$   
 21  $= 0.03$ ; group:  $F(1,28.17) = 0.02$ ,  $p = 0.88$ ; side of cortex:  $F(1,179.85) < 0.01$ ,  $p = 0.94$ ; ear  
 22 stimulated:  $F(1,188.81) = 1.85$ ,  $p = 0.17$ ; group x period:  $F(1,197.39) = 2.81$ ,  $p = 0.09$ ; side of  
 23 cortex x ear stimulated:  $F(1,179.85) = 2.94$ ,  $p = 0.09$ ). Post-hoc testing reveals significant dipole  
 24 changes from initial to chronic CI use in the early-onset group occurs in both cortices with  
 25 stimulation from the NH ear (Initial-Chronic contrast estimate: in the ipsilateral cortex: 3.05,  $p =$   
 26 0.02; in the contralateral cortex: 3.38,  $p < 0.01$ ).

27

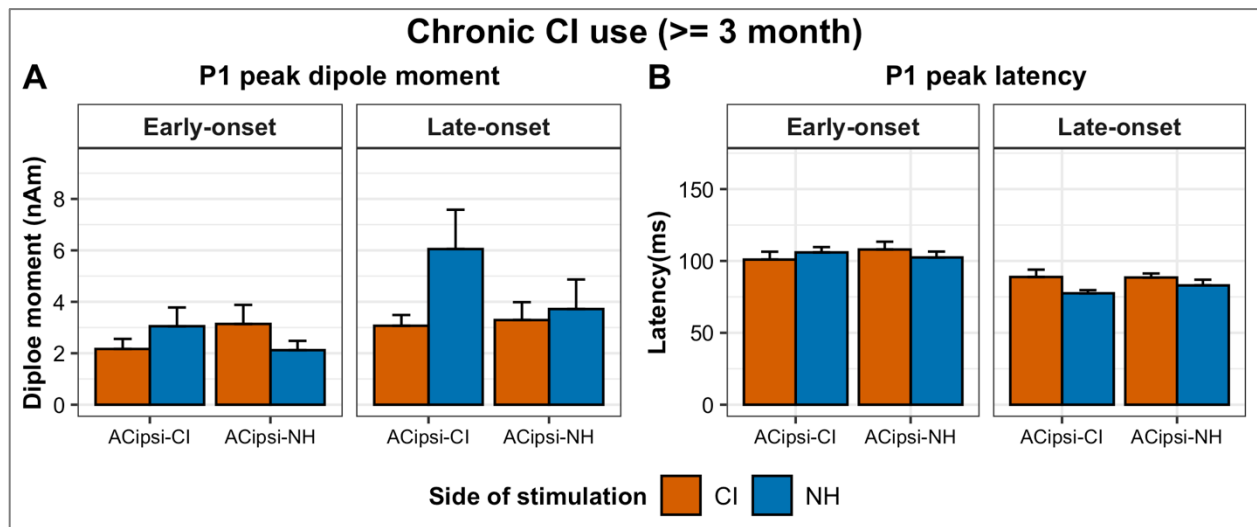

28

29 **Supplementary Figure S1.** In the early-onset group, cortical responses from both ears after  
 30 chronic CI use are stronger in dipole moment (nAm) to the contralateral than ipsilateral ears as  
 31 expected normally (side of cortex:  $F(1,65.03) < 0.01$ ,  $p = 0.96$ ; ear stimulated:  $F(1,69.68) = 0.08$ ,  
 32  $p = 0.78$ ; side of cortex x ear stimulated interaction:  $F(1,65.03) = 5.27$ ,  $p = 0.02$ ). In the late-onset  
 33 group, cortical responses are stronger (nAm) to the NH ear than to the CI (ear stimulated:  $t(44.81)$   
 34  $= 2.12$ ,  $p = 0.04$ ; side of cortex:  $t(44.50) = 0.87$ , ear stimulated x side of cortex:  $t(44.50) = -1.34$ ,  $p$   
 35  $= 0.19$ ). Preference for the NH ear is only present in the contralateral cortex where expected (CI-  
 36 NH contrast estimate: ACipsi-CI: -2.87,  $p = 0.047$ ; ACipsi-NH: -0.32,  $p = 0.82$ ).

37
